# Supplementary material for: Synthesis, characterization and biological activity of new cyclometallated platinum(iv) iodido complexes
Source: Royal Society of Chemistry journal article supplement (doi:10.1039/c7dt03448b), 2017-01-01

## SUPPORTING INFORMATION

**Figure S1.** Partial view of  $^1\text{H}$ -NMR spectrum of a solution of complex **2b** (1 mM) in 50 mM phosphate buffer (in  $\text{D}_2\text{O}$ , pH 7.40) and  $\text{d}^6$ -DMSO (**A**), and after 3 h (**B**) and 10 days (**C**) of storage at 298 K.

**Figure S2.** Partial view (aromatic-imine region) of  $^1\text{H}$ -NMR spectrum of a solution of complex **2c** (1 mM) in 50 mM phosphate buffer (in  $\text{D}_2\text{O}$ , pH 7.40) and  $\text{d}^6$ -DMSO (**A**), and after 24 h (**B**) and 72 h (**C**) of storage at 298 K.

**Figure S3.** Partial view of  $^1\text{H}$ -NMR spectrum of a solution of complex **2b** (1 mM) in 50 mM phosphate buffer (in  $\text{D}_2\text{O}$ , pH 7.40) and  $\text{d}^6$ -DMSO containing 25 mM ascorbic acid (**A**), and after 3 h (**B**) and 10 days (**C**) of storage at 298 K.

**Figure S4.** Partial view (aromatic-imine region) of  $^1\text{H}$ -NMR spectrum of a solution of complex **2c** (1 mM) in 50 mM phosphate buffer (in  $\text{D}_2\text{O}$ , pH 7.40) and  $\text{d}^6$ -DMSO containing 25 mM ascorbic acid (**A**), and after 24 h (**B**) and 72 h (**C**) of storage at 298 K.

**Figure S1.** Partial view of  $^1\text{H}$ -NMR spectrum of a solution of complex **2b** (1 mM) in 50 mM phosphate buffer (in  $\text{D}_2\text{O}$ , pH 7.40) and  $\text{d}^6$ -DMSO (A), and after 3 h (B) and 10 days (C) of storage at 298 K.

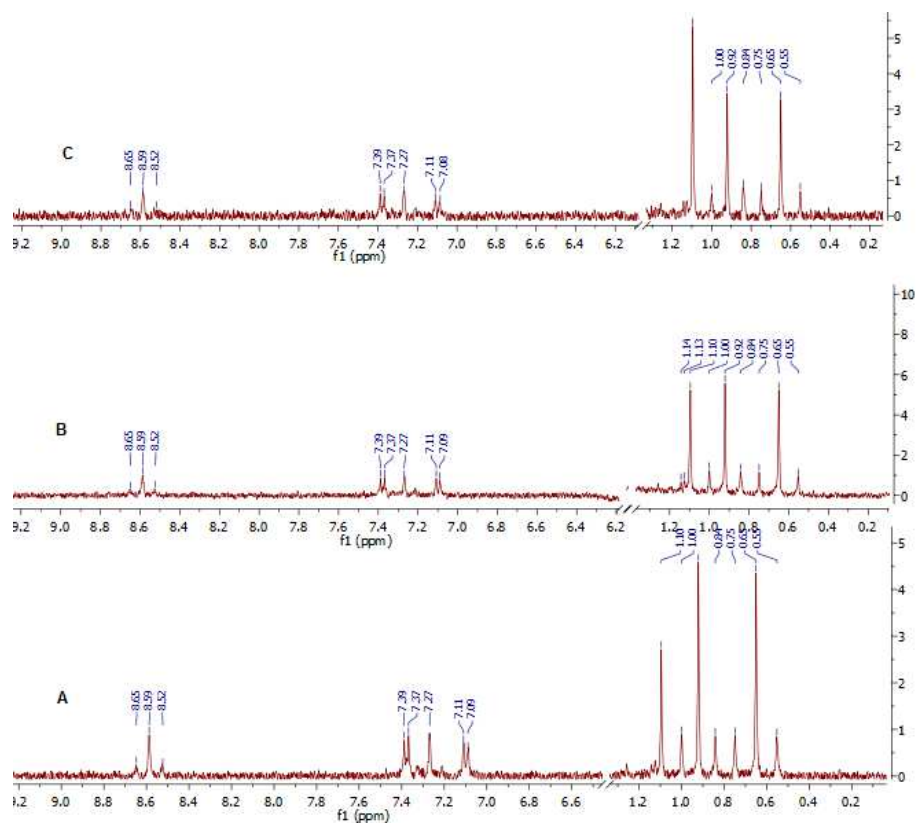

**Figure S2.** Partial view (aromatic-imine region) of  $^1\text{H-NMR}$  spectrum of a solution of complex **2c** (1 mM) in 50 mM phosphate buffer (in  $\text{D}_2\text{O}$ , pH 7.40) and  $\text{d}^6\text{-DMSO}$  (**A**), and after 24 h (**B**) and 72 h (**C**) of storage at 298 K.

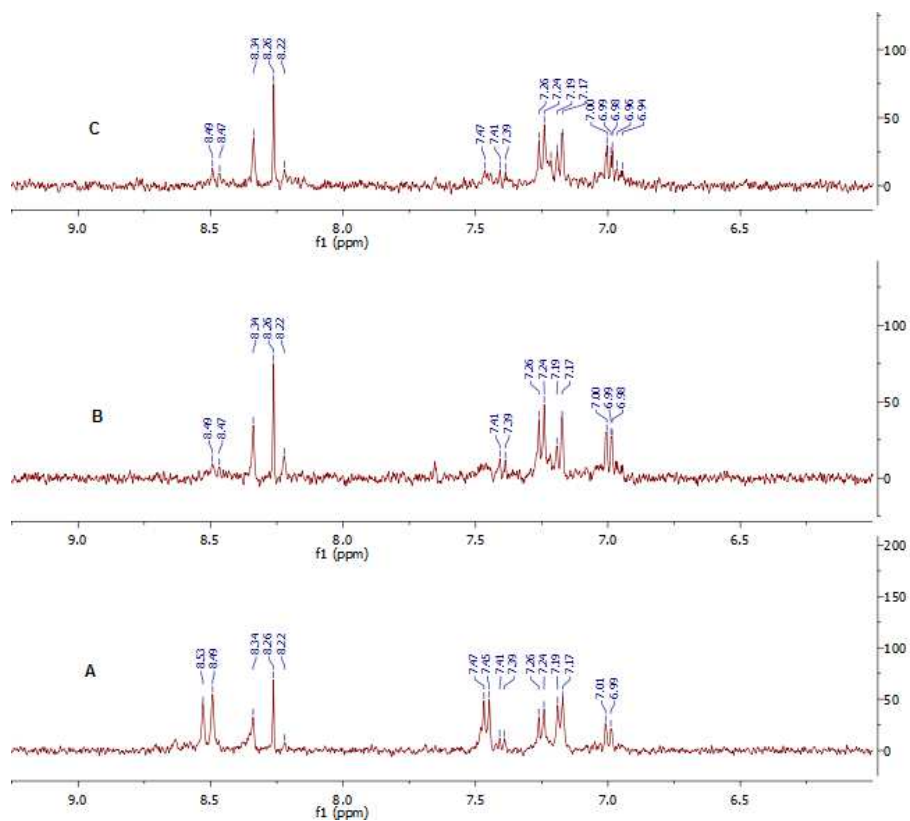

**Figure S3.** Partial view of  $^1\text{H}$ -NMR spectrum of a solution of complex **2b** (1 mM) in 50 mM phosphate buffer (in  $\text{D}_2\text{O}$ , pH 7.40) and  $\text{d}^6$ -DMSO containing 25 mM ascorbic acid (A), and after 3 h (B) and 10 days (C) of storage at 298 K.

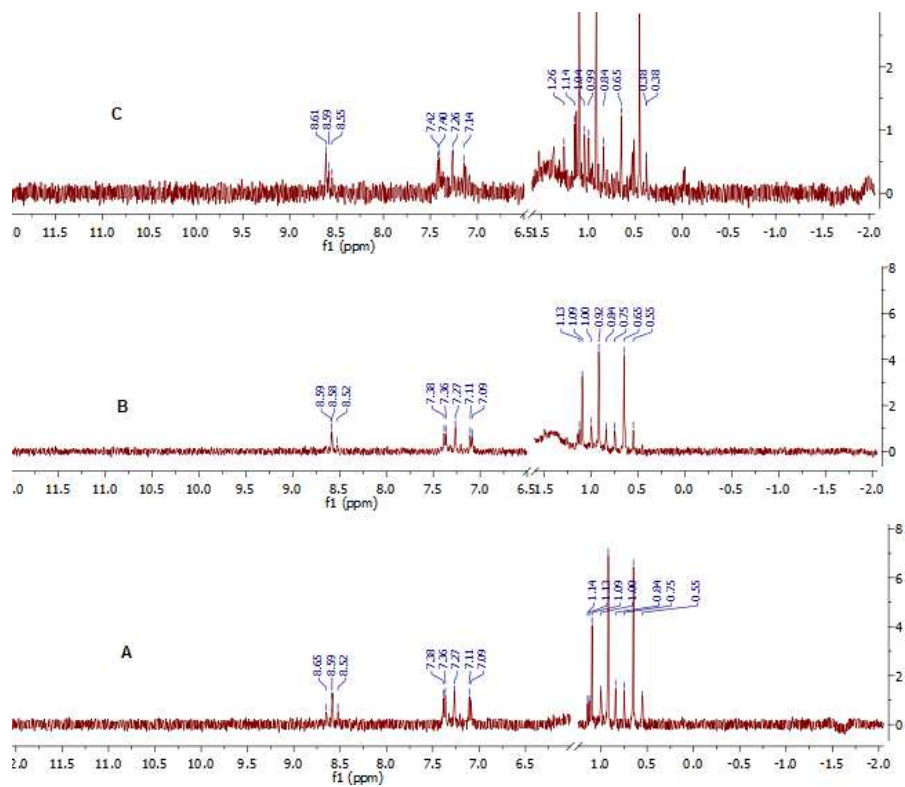

**Figure S4.** Partial view (aromatic-imine region) of  $^1\text{H-NMR}$  spectrum of a solution of complex **2c** (1 mM) in 50 mM phosphate buffer (in  $\text{D}_2\text{O}$ , pH 7.40) and  $\text{d}^6\text{-DMSO}$  containing 25 mM ascorbic acid (**A**), and after 24 h (**B**) and 72 h (**C**) of storage at 298 K.

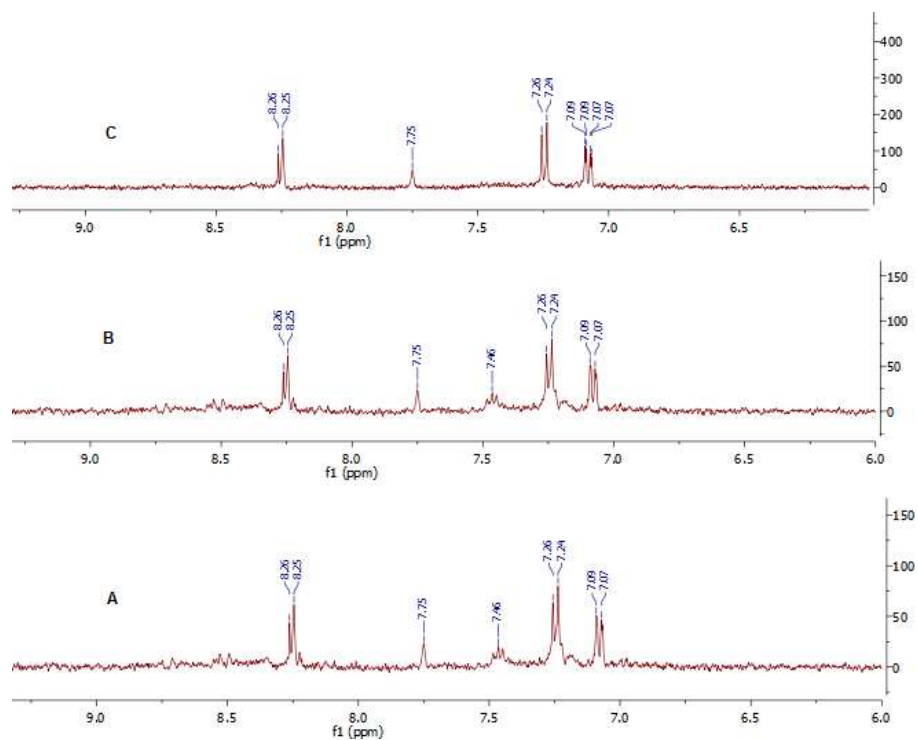

Supplement: c7dt03448b1.pdf [file c7dt03448b1.pdf]
